# Supplementary material
Source: Research Square preprint supplement (doi:10.21203/rs.3.rs-9161824/v1)
Supplement: Supplementary file 1 [file 0f98893e4835362889d36081.docx]

**Prognostic value of albumin-bilirubin score in hepatocellular carcinoma patients treated with Lenvatinib: A Real-world South Indian cohort study**

**Supplementary material 2A: Univariate analysis on factors affecting disease progression**

| **Variables** | **Groups** | | **OR (95% CI)** | **p value** |
| --- | --- | --- | --- | --- |
| **Progressed**  **n (%)** | **Not Progressed**  **n (%)** |
| **Age** |  |  |  | 0.139 |
| </=60 | 64(32.7) | 67(26.3) | 1 |
| >60 | 132(67.3) | 188(73.7) | 0.735(0.489-1.106) |
| **Sex** |  |  |  |  |
| Female | 14(7.1) | 22(8.6) | 1 | 0.564 |
| Male | 182(92.9) | 233(91.4) | 1.22(0.611-2.46) |
| **Hepatitis B** |  |  |  |  |
| Yes | 12(6.1) | 17(6.7) | 0.913(0.425-1.95) | 0.815 |
| No | 184(93.9) | 238(93.3) | 1 |
| **Hepatitis C** |  |  |  |  |
| Yes | 7(3.6) | 6(2.4) | 1.53(0.508-0.64) | 0.443 |
| No | 189(96.4) | 249(97.6) | 1 |
| **AFP** |  |  |  |  |
| Less than 400 | 127(70.2) | 159(72.9) | 1 | 0.541 |
| More than 400 | 54(29.8) | 59(27.1) | 1.14(0.74-1.77) |
| **BCLC** |  |  |  |  |
| A | 49(25) | 89(34.9) | 1 | 0.069 |
| B | 48(24.5) | 50(19.6) | 1.55(0.99-2.40) |
| C | 99(50.5) | 116(45.5) | 1.74(1.02-2.95) |
| **ALBI** |  |  |  |  |
| Grade 1 | 65(33.2) | 84(32.9) | 1 | 0.960 |
| Grade >/=2 | 131(66.8) | 171(67.1) | 0.99(0.66-1.47) |
| **Portal vein thrombosis** |  |  |  |  |
| Yes | 54(27.6) | 60(23.5) | 1.23(0.80-1.89) | 0.330 |
| No | 142(72.4) | 195(76.5) | 1 |
| **Focal lesions** |  |  |  |  |
| 1 and 2 | 138(70.4) | 188(73.7) | 1 | 0.435 |
| >2 | 58(29.6) | 67(26.3) | 1.17(0.77-1.78) |
| **Initial dose** |  |  |  |  |
| 4mg | 119(60.7) | 195(76.5) | 1 | <0.001* |
| 8 and 12mg | 77(39.3) | 60(23.5) | 2.10(1.39-3.16) |
| **Extrahepatic spread** |  |  |  |  |
| Yes | 28(14.3) | 11(4.3) | 3.69(1.79-7.63) | <0.001* |
| No | 168(85.7) | 244(95.7) | 1 |

Abbreviations: AFP – Alpha-Fetoprotein; BCLC – Barcelona Clinic Liver Cancer; ALBI –Albumin–Bilirubin

**Supplementary material 2B: Multivariate analysis on factors affecting disease progression**

| Variables | OR | 95% CI | P value |
| --- | --- | --- | --- |
| **Initial dose** | 1.95 | (1.29-2.97) | 0.002* |
| **Extrahepatic spread** | 3.59 | (1.69-7.60) | 0.001* |
| **BCLC -B** | 1.27 | (0.80-2.00) | 0.305 |
| **BCLC-C** | 1.66 | (0.97-2.85) | 0.064 |

Abbreviations: BCLC – Barcelona Clinic Liver Cancer;
