# Supplementary material
Source: Research Square preprint supplement (doi:10.21203/rs.3.rs-9161824/v1)
Supplement: Supplementary file 2 [file 9ae5459fb37d7a695e33d286.docx]

**Prognostic value of albumin-bilirubin score in hepatocellular carcinoma patients treated with Lenvatinib: A Real-world South Indian cohort study**

**Supplementary material 1A: Univariate analysis on factors affecting drug discontinuation**

| **Variables** | **Groups** | | **OR(95% CI)** | **p value** |
| --- | --- | --- | --- | --- |
| **DC**  **n(%)** | **Not DC**  **n(%)** |
| **Age** |  |  |  | 0.956 |
| </=60 | 38(29.2) | 93(29) | 1 |
| >60 | 92(70.8) | 228(71) | 1.01(0.64-1.58) |
| **Sex** |  |  |  |  |
| Female | 8(6.2) | 28(8.7) | 1 | 0.362 |
| Male | 122(93.8) | 293(91.3) | 0.68(0.304-1.54) |
| **Hepatitis B** |  |  |  |  |
| Yes | 8(6.2) | 21(6.5) | 0.937(0.404-2.17) | 0.879 |
| No | 122(93.8) | 300(93.5) | 1 |
| **Hepatitis C** |  |  |  |  |
| Yes | 2(1.5) | 11(3.4) | 0.440(0.096-2.01) | 0.438 |
| No | 128(98.5) | 310(96.6) | 1 |
| **AFP** |  |  |  |  |
| Less than 400 | 80(70.2) | 206(72.3) | 1 | 0.673 |
| More than 400 | 34(29.8) | 79(27.7) | 1.10(0.697-1.78) |
| **BCLC** |  |  |  |  |
| A | 32(24.6) | 106(33) | 1 | 0.50 |
| B | 29(22..3) | 69(21.5) | 1.39(0.77-2.50) |
| C | 69(53.1) | 146(45.5) | 1.56(0.96-2.55) |
| **ALBI** |  |  |  |  |
| Grade 1 | 46(35.4) | 103(32.1) | 1 | 0.500 |
| Grade >/=2 | 84(64.6) | 218(67.9) | 0.863(0.562-1.325) |
| **Portal vein thrombosis** |  |  |  |  |
| Yes | 41(31.54) | 73(22.7) | 1.56(0.99-2.46) | 0.052 |
| No | 89(68.5) | 248(77.3) | 1 |
| **Focal lesions** |  |  |  |  |
| 1 and 2 | 86(66.2) | 240(74.8) | 1 | 0.064 |
| >2 | 44(33.8) | 81(25.2) | 1.51(0.974-2.35) |
| **Initial dose** |  |  |  |  |
| 4mg | 91(70) | 223(69.5) | 1 | 0.912 |
| 8 and 12mg | 39(30) | 98(30.5) | 0.975(0.626-1.52) |
| **Extrahepatic spread** |  |  |  |  |
| No | 114(87.7) | 298(92.8) | 1 | 0.078 |
| Yes | 16(12.3) | 23(7.2) | 1.818(0.927-3.56) |

Abbreviations: DC- Discontinuation; AFP – Alpha-Fetoprotein; BCLC – Barcelona Clinic Liver Cancer; ALBI –Albumin–Bilirubin; HBV – Hepatitis B Virus; HCV – Hepatitis C Virus; PVT – Portal Vein Thrombosis

**Supplementary material 1B: Multivariate analysis on factors affecting drug discontinuation**

| **Variables** | OR | 95% CI | P value |
| --- | --- | --- | --- |
| **Portal vein thrombosis** | 1.474 | 0.932-2.331 | 0.097 |
| **Extrahepatic spread** | 1.751 | 0.886-3.461 | 0.107 |
| **Focal lesions** | 1.491 | 0.954-2.329 | 0.079 |
