# Supplementary material
Source: Research Square preprint supplement (doi:10.21203/rs.3.rs-9161824/v1)
Supplement: Supplementary file 3 [file a227f8738da9671e6bb61baa.docx]

**Prognostic value of albumin-bilirubin score in hepatocellular carcinoma patients treated with Lenvatinib: A Real-world South Indian cohort study**

**Supplementary material 3A: Cancer-directed therapies' effect on overall survival**

| **Treatments** | **Categories** | **Mean survival (days)** | **Std. Error** | **95% CI** | | **p value** |
| --- | --- | --- | --- | --- | --- | --- |
| LB | UB |
| Cancer directed | Yes | 1400.3 | 260.14 | 889.63 | 1909.38 | <0.001* |
|  | No | 535.50 | 55.12 | 427.45 | 643.55 |
| Liver transplantation | Yes | 955.87 | 105.20 | 749.66 | 1162.08 | 0.111 |
|  | No | 1188.3 | 211.24 | 774.28 | 1602.35 |
| Liver section | Yes | 870.28 | 119.71 | 635.64 | 1104.91 | 0.612 |
|  | No | 1246.3 | 234.21 | 786.75 | 1704.87 |
| TARE | Yes | 1135.3 | 320.39 | 506.60 | 1762.54 | 0.626 |
|  | No | 1195.3 | 212.82 | 778.20 | 1612.48 |
| TACE | Yes | 1890.3 | 421.48 | 1063.92 | 2716.13 | <0.001* |
|  | No | 875.79 | 81.07 | 716.89 | 1034 |
| SBRT | Yes | 640.03 | 77.29 | 488.53 | 791.52 | 0.701 |
|  | No | 1254.3 | 228.67 | 805.17 | 1702.12 |
| MWA | Yes | 883.02 | 70.22 | 758.11 | 1669.63 | 0.054 |
|  | No | 1214.3 | 232.53 | 758.11 | 1669.63 |
| RFA | Yes | 1376.3 | 319.65 | 749.90 | 2002.95 | 0.101 |
|  | No | 909.16 | 69.14 | 773.63 | 1044.70 |

Abbreviations: CI – Confidence Interval; LB – Lower Bound; UB – Upper Bound; TARE – Transarterial Radioembolization; TACE – Transarterial Chemoembolization; SBRT – Stereotactic Body Radiotherapy; MWA – Microwave Ablation; RFA – Radiofrequency Ablation

**Supplementary material 3B: Cancer-directed therapies' effect on progression-free survival**

| **Treatments** | **Categories** | **Mean survival (days)** | **Std. Error** | **95% CI** | | **p value** |
| --- | --- | --- | --- | --- | --- | --- |
| LB | UB |
| Cancer directed | Yes | 1024.3 | 119.23 | 313.06 | 472.31 | 0.003* |
|  | No | 392.68 | 40.62 | 313.06 | 472.31 |
| Liver transplantation | Yes | 833.49 | 129.32 | 580.02 | 1086.96 | 0.047* |
|  | No | 880.81 | 163.28 | 560.78 | 1200.83 |
| Liver section | Yes | 648.36 | 125.36 | 402.65 | 894.08 | 0.708 |
|  | No | 943.69 | 181.01 | 588.91 | 1298.48 |
| TARE | Yes | 603.53 | 235.28 | 142.38 | 1064.69 | 0.638 |
|  | No | 926.00 | 174.01 | 584.92 | 1267.08 |
| TACE | Yes | 1307.3 | 251.69 | 876.64 | 1863.29 | 0.029* |
|  | No | 683.48 | 64.26 | 557.54 | 809.43 |
| SBRT | Yes | 398.17 | 60.80 | 278.98 | 517.35 | 0.162 |
|  | No | 970.50 | 186.45 | 605.05 | 1335.95 |
| MWA | Yes | 651.48 | 70.09 | 514.10 | 788.86 | 0.254 |
|  | No | 903.27 | 177.75 | 554.87 | 1251.68 |
| RFA | Yes | 1088 | 277.92 | 542.79 | 1632.26 | 0.197 |
|  | No | 638.75 | 47.63 | 542.38 | 729.11 |

Abbreviations: CI – Confidence Interval; LB – Lower Bound; UB – Upper Bound; TARE – Transarterial Radioembolization; TACE – Transarterial Chemoembolization; SBRT – Stereotactic Body Radiotherapy; MWA – Microwave Ablation; RFA – Radiofrequency Ablation
